# Supplementary material for: Membranous or Hypermobile Stapes Footplate: A New Anatomic Site Resulting in Third Window Syndrome
Source: Front Neurol. 2020 Aug 20;11:871. doi: 10.3389/fneur.2020.00871 (PMC7468399; doi:10.3389/fneur.2020.00871)
Supplement: Supplementary file 1 [file Table_1.XLSX]

## Sheet: Sheet1
NO	AGE (YRS)	SYMPTOM DURATION (MTS)	POSSIBLE ETIOLOGY	ASSOCIATED SYMPTOMS	FISTULA SIGN	SURGERY SIDE	FINDINGS	RESULTS & NOTES
1	31	26	pain while snorkeling	light headed, hyperacusis	AU AD>AS	AD	AD: membranous footplate, no perilymph leak	Complete Resolution, Occasional light headedness
2	55	12	severe blow over occiput from falling door and frame	headaches, "foggy feeling," hyperacusis	AU	AU	AD:membranous in center of footplate, no perilymph leak. AS: membranous, no leak	Complete Resolution
3	69	21	mild head trauma, possible osteoporosis, bilateral SSCD	spinning sensation, hyperacusis	AD	AD	AD: stapes footplate intact but hypermobile, no perilymph leak	Complete Resolution
4	38	12	motor vehicle accident	hyperacusis	AU AD>AS	AD	AD: membranous footplate, no perilymph leak	Complete Resolution
5	36	30	electric shock at work with fall at work striking head	hyperacusis	AU AS>AD	AS	AS: membranous footplate, no perilymph leak	Complete Resolution
6	16	2	weight lifting , concussions playing football	migraine, light headed, hyperacusis	AS	AS	AS: footplate intact, perilymph fluid leak	Complete Resolution
7	50	26	motor vehicle accident	headaches, light headed, hyperacusis	AU AS>AD	AS	AS: footplate intact, perilymph fluid leak	Complete Resolution for 2 months. Now has migraine headaches and recurrent symptpoms
8	41	15	blast injury in Afghanistan, two concussions	traumatic brain injury, postconcussive migraine	AU AD>AS	AD	AD: membranous defect in center of footplate, no perilymph leak	Complete Resolution, Occasional light headedness
9	39	11	hit on right temple by engine block on conveyer belt	cannot ride in an elevator, hyperacusis	AD	AD	AD: membranous footplate, no perilymph leak	Complete Resolution. Has problems tracking fast moving objects and has eye floaters
10	68	28	possible osteoporosis	spinning sensation, hyperacusis	AD	AD	AD: stapes footplate intact, perilymph leak	Complete Resolution
11	58	11	multiple falls and concussion	migraine,meniere,left BPPV, hyperacusis	AU AD>AS	AD	AD: stapes footplate intact, perilymph leak	Complete Resolution
12	56	21	concussion, several falls, vehicle accident	hyperacusis	AU AS>AD	AU	AS: membranous footplate, no perilymph leak, AD: membranous footplate, no perilymph leak	Complete Resolution. 23 months later patient involved in MVA. Resolved after revision surgery AS
13	16	32	heat stroke and fall with occiput hitting concrete	could not tolerate tuning fork test	AU AD>AS	AD	AD: membranous footplate, no perilymph leak	Complete Resolution
14	49	22	barotrauma after flight, mild head trauma	hearing fluctuates, sensation of passing out	AU	AU	AD:membranous footplate posterior half, no leak; AS membranous footplate no leak	Complete Resolution, able to fly to Belgium
15	60	25	sudden left SNHL of uncertain etiology, possible mild trauma	spinning sensation with pneumatic otoscopy	AS	AS	AS: two membranous defects in the footplate, no perilymph leakage	Complete Resolution for 7 months then recurred after a coughing fit. Managed conservatively
16	24	37	head injury from falling out of second floor window	suggestive of meniere disease, hyperacusis	AS	AS	AS: membranous footplate, with possible perilymph leak	Failed treatment. 2 days following treatment lifted 46 lbs. Felt something pop in ears with recurrent symptoms. Lost to followup.
17	43	6	head injury and unconciousness from fall, car accident	heavy metal exposure, history of BPPV	AD	AD	AD: footplate intact hypermobile footplate, no perilymph leak	Complete Resolution. 1 year post car accident, deployment of airbags, symptoms recurred but resolved completely
18	41	28	multiple falls and minor head trauma	migraine, scotomas, hyperacusis,	AD	AD	AD: membranous footplate, no perilymph leak	Complete Resolution. Cervical steal syndrome detected however
19	56	14	head injury, found unconcious	history of meningitis and mastoiditis	AD	AD	AD: footplate intact, perilymph leak present	Complete Resolution
20	46	62	severe car accident with loss of conciousness	hyperacusis, tired, cannot fly,	AS	AS	AS: intact footplate with possible perilymph leak	Complete Resolution. Able to fly
21	54	23	severe car accident with whiplash and loss of conciousness	spinning,hyperacusis, neck surgery, headaches	AU AS>AD	AS	AS: perilymph fluid contained in sac, possible perilymph leak, but footplate intact and hypermobile	Partial Resolution. Did not keep follow-up
22	27	18	car accident with whiplash	hyperacusis with Tullio and Hennebert	AD	AD	AD: irregular membranous deficiency in footplate, hypermobile but no perilymph leak	Complete Resolution
23	54	28	car accident with whiplash and concussion	BPPV treated, fogginess, hyperacusis	AD	AD	AD: membranous dehiscence in bony footplate, no perilymph leak	Complete Resolution. One week post-op had minimal symptms which resolved
24	34	30	car accident with whiplash and multiple fractures and head trauma	BPPV treated, fogginess, hyperacusis	AU	AU	AD: Crack in stapes footplate, no perilymph leak, AS:crack in stapes footplate but perilymph leak at round window	Partial resolution. Patient feels much better but not quite normal. Lost to follow-up
25	24	43	struck by car and fall from jet ski	BPPV treated, hyperacusis, dysautonomia	AD	AD	AD: crack in footplate, no perilymph leak	Failed treatment. Stayed symptomatic, postural hypotension
26	50	21	blow to head	hearing cell phone causes nystagmus	AD	AD	AD: membranous defect in footplate, no perilymph leak	Complete resolution after revision surgery. (Patient had coughing fit 2 weeks after surgery with recurrent symptoms)
27	22	6	blow to ear with baseball glove	falls to right with noise. 30 % difference in VEMP	AD	AD	AD: ? crack in footplate, no perilymph leak, hypermobile stapes footplate	Complete Resolution
28	62	27	blow wit football on right side	"fun house" bending forward results in fall,staggering	AS	As	AS: membranous footplate, no perilymph leak	Complete Resolution. Immediate resolution 24 hours post surgery. VEMP normailzed prominent OTR
